# Supplementary material for: Urine and serum S100A8/A9 and S100A12 associate with active lupus nephritis and may predict response to rituximab treatment
Source: RMD Open. 2020 Jul 28;6(2):e001257. doi: 10.1136/rmdopen-2020-001257 (PMC7722276; doi:10.1136/rmdopen-2020-001257)
Supplement: Supplementary data [file rmdopen-2020-001257supp006.xlsx]

## Sheet: Sheet1
Subject	Serum S100A12 (ng/mL)	Serum S100A8/9 (ng/mL)	Urine S100A12 (ng/mmol Cr)	Urine S100A8/9 (ng/mmol Cr)	Renal disease	Sex	Ethnicity
Patient 1	1486.39	9604.69	12	20051	No	F	White
Patient 2	661.18	8806.12	10396	476415	Yes	F	Asian
Patient 3	780.49	9911.69	618	301825	Yes	F	White
Patient 4	1564.01	11345.6	802	124356		F	Black
Patient 5	1938.59	8939.34	4649	521662	No	F	White
Patient 6	708.18	5876.45	22300	432612	No	F	Not specified
Patient 7	1312.55	10102	33	51255		F	White
Patient 8	2736.07	18068.3	6249	383377	Yes	F	White
Patient 9	357.79	3894.31	258	201792	No	F	White
Patient 10	797.52	8137.53	214	65471	No	F	Black
Patient 11	1677.1	6458.53	311	96965	Yes	F	White
Patient 12	1748.1	15002.9			No	F	White
Patient 13	5150.87	19192.3				F	Asian
Patient 14	793.95	11175.8			No	F	White
Patient 15	629.77	9300.04			Yes	F	White
Patient 16	1005.19	15130.8	675	43788	No	F	Asian
Patient 17	1152.05	6629.02	99	84243	Yes	F	Not specified
Patient 18	2796.94	16752.9	1062	1363	No	F	White
Patient 19	865.9	11067.5	18606	337547	Yes	F	White
Patient 20	1585.82	15701.9	2	92876	Yes	F	Black
Patient 21	2604.48	20859.3	12	82463	Yes	F	Black
Patient 22	2969.13	26943.9	661	1207064	No	F	Asian
Patient 23	1200.68	11678.5			Yes	F	Not specified
Patient 24	1679.27	9135.28	1785	37298	Yes	F	Other
Patient 25		7092.37	77	1309	Yes	M	Asian
Patient 26	363.97	3034.19			No	F	White
Patient 27	1450.86	13490.2	3473	807015	No	F	Not specified
Patient 28	1419.51	17667.8	1944	156649	Yes	F	Asian
Patient 29	4811.78	31189.9	28129	1329512	Yes	F	White
Patient 30	1605.62	8701.96	78487	174441	No	F	Asian
Patient 31	3547.73	32742.5			Yes	F	Asian
Patient 32	901.37	9173.39	564	17867	No	M	Asian
Patient 33	3282.41	22153.3	3722	8054	Yes	F	Asian
Patient 34	213.63	7650.8	557	273415	Yes	F	Asian
Patient 35	1047.56	17586	2543	265525	Yes	F	Asian
Patient 36	882.18	9203.1	2930	842535	Yes	F	Asian
Patient 37	629.07	7507.92	221	187562	No	F	Asian
Patient 38	969.7	17274.8	3149	136453		F	Black
Patient 39	489.33	7709	15265	206893	Yes	F	Asian
Patient 40	489.33	7709	15265	206893	Yes	F	Asian
Patient 41	880.64	11923.2	35615	2570085	Yes	F	Asian
Patient 42	274.71	4393.29	11205	991818	No	F	Asian
Patient 43	1963.89	13480	1179	172574		F	Black
Patient 44	887.49	6238.53	4386	25612	Yes	F	White
Patient 45	1245.76	13028.8	2825	117168	Yes	F	Asian
Patient 46	174.41	1171.74	3718	362082	Yes	F	Black
Patient 47	1081.88	9301.3			Yes	F	White
Patient 48	1717.36	13710.1	4473	156422	No	F	White
Patient 49	3310.88	10073.8	8	2560	No	F	White
Patient 50	2422.74	14203	439	11528	No	F	White
Patient 51	982.22	5947.75	1342	4119	No	F	White
Patient 52	995.52	7656.34	2	116934	No	F	White
Patient 53	5011.4	20705.3	16612	58087	No	F	White
Patient 54	701.46	8912.18	3015	421762	No	F	White
Patient 55	1054.72	7346.74	209	49286	No	F	White
Patient 56	1091.07	6650.53	340	74127	No	F	White
Patient 57	4416.81	24924.3	12219	351952	No	F	White
Patient 58	1964.49	10648.8			No	F	White
Patient 59	244.86	2080.67	48	74642	No	F	Asian
Patient 60	2515.62	16550.9	1489	371084	No	F	White
Patient 61	1975.84	21514.1			No	F	White
Patient 62	692.63	5242.23			No	F	White
Patient 63	412.52	4457.58	1281	177885	No	F	Asian
Patient 64	261.69	11767.4	1275	36199	Yes	F	White
Patient 65	3204.18	25504.7				F	White
Patient 66	1857.01	18377.6			No	F	Asian
Patient 67	1205.19	8620.81	15680	670209	No	F	White
Patient 68	303.31	2991.86	2	35907	No	F	White
Patient 69	1409.89	12609.8	1169	338570	No	F	White
Patient 70	946.99	7414.94			No	F	White
Patient 71	4113.89	22188.7			No	F	Asian
Patient 72	1750.39	13464.5			No	F	White
Patient 73	2634.26	21492.2	368	42629	No	F	White
Patient 74	2466.43	15624			Yes	M	White
Patient 75	2098	13282	10393	395855	Yes	F	White
Patient 76	429.11	4019.51	201	41542	No	M	Black
Patient 77	315.1	3365.55	674	128005	No	F	White
Patient 78					No	M	White
Patient 79	3932.98	19456.5			No	F	White
Patient 80	3824.16	20831.2	115	23801	No	M	White
Patient 81	332.49	4695.65	284	24104	Yes	F	White
Patient 82	569.97	8906.17	21012	164452	Yes	F	White
Patient 83	1229.39	15136.1	7225	312992	No	F	Black
Patient 84	1229.39	15136.1			No	F	Black
Patient 85	3167.27	15721.4	211	206588	No	F	White
Patient 86	417.57	2711.65	13337	173499	No	F	Asian
Patient 87	2423.03	14881.2			No	F	White
Patient 88	3069.83	17690.3	155	32888	No	F	Other
Patient 89	353.42	9506.65	17423	1043504	Yes	F	Asian
Patient 90	338.31	2643.32	962	50206	Yes	F	Other
Patient 91	1377.71	8379.11	458	35660	Yes	F	Black
Patient 92	431.92	3070.35	225	601938	Yes	F	White
Patient 93	2953.14	19557.5	950	24680	No	F	White
Patient 94	1510.97	14181.4	9985	194590	Yes	F	White
Patient 95	1227.05	11509.3	86	2342	No	M	Other
Patient 96	840.89	7447.92	1516	35446	No	F	White
Patient 97	543.05	6699.85	22	47378	Yes	M	Black
Patient 98	1430.18	10254.5	83865	433239	Yes	F	White
Patient 99	1031.88	23069.7	1281	172378	Yes	F	White
Patient 100	3101.93	16054.6	259	73132	No	F	White
Patient 101	517.15	13227.1	23347	592408	Yes	F	White
Patient 102	1773	27620			No	F	White
Patient 103	2470.57	15817.4			No	M	Not specified
Patient 104	893.61	10810.6			Yes	F	White
Patient 105	1073.85	6932.88			No	F	White
Patient 106	1398.68	12545.2	11766	412804	Yes	F	Not specified
Patient 107	1205.16	6017.14			Yes	F	Not specified
Patient 108	1228.03	11252.2	74749	469169	Yes	F	White
Patient 109	1933.5	12585.1	5747	172988	Yes	F	Asian
Patient 110	93.42	1488.38	102	149414	No	F	Black
Patient 111	1389.35	12012.3	1235	803630	No	F	White
Patient 112	15260	77593.7	13425	94231	No	F	Other
Patient 113	1974.26	9646.16	1724	98877	No	F	White
Patient 114	1005.39	7653.59	257	97953	No	F	Asian
Patient 115	1023.33	12260.9	573	87483	Yes	F	Black
Patient 116	1446.67	11533	1429	203306	No	F	White
Patient 117	2429.65	9495.39	390	11740	No	F	Asian
Patient 118	6471.35	36219.7			No	F	White
Patient 119	953.54	16123.3	4610	180213		F	Black
Patient 120	3395.74	12262.9	1830	55508		F	White
Patient 121	977	7674	696	7930	No	F	White
Patient 122	748	7545	15725	110100	Yes	F	White
Patient 123	458.98	6124.41	362	99574	No	M	White
Patient 124	3780.86	18650.8	2475	104633	No	F	Other
Patient 125	572.57	8689.99	2551	828509		F	Black
Patient 126	1147.71	17631.5	9189	139914		F	Not specified
Patient 127	598.59	4737.98	572	25969	Yes	F	White
Patient 128	3692.24	18389.1	4616	234117	No	F	White
Patient 129	971.13	6886.32	84	17720		M	Asian
Patient 130	2106.56	22801.5	2741	249467	No	F	Black
Patient 131	1022.86	5083.42	6504	281182	No	F	Black
Patient 132	1856.78	9616.23	1295	1565485	No	F	White
Patient 133	410.56	5321.87			No	F	White
Patient 134	88.14	1010.46	244	66891	No	F	Black
Patient 135	1251.21	5669.45			No	F	Asian
Patient 136	1768.92	16385.9	227	3392	No	M	Asian
Patient 137	1099.01	8560.17			Yes	F	Black
Patient 138	223.95	2114.57	2079	405577	Yes	F	Asian
Patient 139	2617.84	15367	3622	163912	Yes	F	Black
Patient 140	3599.69	20582.9	3337	65661	No	F	White
Patient 141	2276.8	28932.7	372	137354	No	F	White
Patient 142	2754.27	22505.1	31	62715	No	F	White
Patient 143	1985.72	12310.8			No	F	White
Patient 144	1828.89	15964.4	1822	344862	Yes	F	Asian
Patient 145	1030.61	15268.6	323	122043	No	F	Black
Patient 146	1114.91	11954.6	1694	330274	Yes	F	White
Patient 147	966	10614.4	594400	1366970	No	F	White
Patient 148	9528.62	70721.5	83	9464	Yes	M	Black
Patient 149	152.67	1631.06	160	45292	No	F	Black
Patient 150	3512.87	15990.6	345	105243	No	F	White
Patient 151	109.17	8251.8	9011	1330307	Yes	F	White
Patient 152	986.45	7791.89	7231	993165	No	F	Asian
Patient 153	1401.04	14725.7			No	F	White
Patient 154	1888.4	10130.5	6609	372396	Yes	F	White
Patient 155	1710.07	8228.45	18	70939	No	F	White
Patient 156	1098.07	15004.1	133	13133	No	F	White
Patient 157	1167.8	14591.5	175	138766	No	F	White
Patient 158	1598.34	7372.52	1476	9861	Yes	M	Asian
Patient 159	780	6395	384	55647	Yes	F	White
Patient 160	4303.97	20392	9	2942	No	M	White
Patient 161	3554.22	16208.1	142	19993	No	F	White
Patient 162	2583.6	21743.7	152	7171911	Yes	F	Asian
Patient 163	7.81	17891.8	49	31041	No	F	White
Patient 164	363.44	4325.32	38	52810	No	F	White
Patient 165	283.53	2867.87	3309	481413	No	F	White
Patient 166	2205.36	16136.3	593	211447	No	F	Not specified
Patient 167	112.2	6492.35	87	207689	No	F	Black
Patient 168			614	328143	Yes	F	White
Patient 169	1991.88	11179.1	9	1820	No	M	White
Patient 170	1178.62	6436.01	5727	357223	No	F	White
Patient 171	2567.03	21044.5	17	48213	No	F	White
Patient 172	608.55	10554.4	4	20410	Yes	F	Black
Patient 173			28	63500	No	F
Patient 174	1836.15	9907.42	407	176023	No	F	White
Patient 175	2731.53	23522.4	20	10859	No	F	White
Patient 176	1257.39	17457.3	124	605332	Yes	F	Other
Patient 177	1218.48	18659.9			No	F	White
Patient 178	2984.11	13514.4	915	11074	No	F	White
Patient 179	1369.07	8103.66			No	F	White
Patient 180	3431.73	16163.6	31	21131	Yes	F	White
Patient 181	782.83	7757.44	31	294363	Yes	F	White
Patient 182	986.39	8280.55	124	27232	No	F	White
Patient 183	1157.05	11476.2	612	409139	Yes	F	White
Patient 184	926.27	7008.84	24	910	No	M	White
Patient 185	2621.64	14838.1	6056	317297	Yes	F	White
Patient 186	186.61	2852.71	936	156872	Yes	F	White
Patient 187	3588.45	10051.1	4053	77362	No	F	White
Patient 188	2623.39	24765.1	97630	490383	No	F	White
Patient 189	1378.72	7330.59	3389	95798	No	F	White
Patient 190	1580.58	13916.5	685	96307	No	F	White
Patient 191	537.69	5382.19			No	F	White
Patient 192			94698	2973052	Yes	F	Not specified
Patient 193	1112.35	9580.76	91468	605658	No	F	White
Patient 194	186.32	1525.14	14572	695534		F	Black
Patient 195	789.01	3454.23	2762	81783	No	F	Asian
Patient 196	1071.35	14497.7	85422	269791	Yes	F	White
Patient 197	2310.7	19249.5	67	70553	No	F	White
Patient 198	2639.03	15801.7	6561	44311	Yes	F	White
Patient 199	117.33	1293.98	614	54459	Yes	F	Asian
Patient 200	4606.51	21072.1	851	79849	No	F	White
Patient 201	619.1	11871.8	6126	128972	Yes	F	White
Patient 202			8	76209	Yes	F	White
Patient 203	1243.9	10066.2	1233	100954	Yes	F	White
Patient 204	3266.05	17402.1			No	M	Other
Patient 205	3988.92	17321.7	113853	112070	No	F	White
Patient 206	2379.85	11463.3	234	21148	No	F	Not specified
Patient 207	1466.78	13139.6	2048	100308	Yes	F	White
Patient 208	2964.43	21032.1	51	63995	Yes	F	Asian
Patient 209	1178.96	27806.5	2541	134787		F	White
Patient 210	3631.83	14426.2	891	178179	No	F	White
Patient 211	5042.12	22993.8	10824	173309	No	F	White
Patient 212	2363.7	11212.4	3484	17219		F	White
Patient 213	723.13	6737.68	18205	30831		F	White
Patient 214			9139	22881		F	White
Patient 215	206.98	1651.24	11102	94738	No	F	White
Patient 216	2044.6	8811.22			No	F	White
Patient 217			1	24766		F	Black
Patient 218	1276.66	8400.28				F	Other
Patient 219	566.8	5856.23	21411	2620940	Yes	F	Asian
Patient 220	829.1	3625.57	468	213007	Yes	F	Other
Patient 221	522.62	2585.63				F	Not specified
Patient 222	342.41	3990.19	527	151345	Yes	M	White
Patient 223	1.64	22953.3	573	81339	Yes	F	White
Patient 224	306.08	3175.62			No	F	White
Patient 225			2307	60791	No	F	White
Patient 226	1018.94	8449.24	280861	88604	No	F	Other
Patient 227	323.47	6468.23				F	White
Patient 228	1155.71	12077.6			No	M	White
Patient 229	330.61	4372.56	1086	852916	Yes	M	Other
Patient 230	704.72	8610.59	9357	340650	Yes	F	Black
Patient 231	323.15	2290.11	101402	2094512		F	White
Patient 232	342.14	1276.82	10589	179051	No	F	White
Patient 233	635.98	4188.95	109	44400	No	F	White
Patient 234	795.08	8139.06	102	38387	Yes	F	White
Patient 235	1610.36	21693.4	340	125632		F	White
Patient 236	37.16	757.11			Yes	F	White
Patient 237	486.75	4239.19	8182	334658		F	Asian
Patient 238	1370.38	9553	40436	467200	No	F	White
Patient 239	1946.69	6181.02	9018	206170	No	F	White
Patient 240	182.12	1082.11				F	White
Patient 241	1077.34	30644.6	592936	3867529	Yes	F	White
Patient 242	1246.42	8054.23				F	White
Patient 243	226.4	25466.3	52745	993315	No	F	White
Control 1	409.28	6467.98	4654.21	121684	N/A	F	White
Control 2	92.6402	684.388	29531.1	86381.6	N/A	F	White
Control 3	214.318	719.422	24862.4	379859	N/A	F	White
Control 4	40.9962	572.994	43027.7	43027.7	N/A	M	White
Control 5	61.1932	192.207	56.6282	2984.89	N/A	F	White
Control 6	44.7612	251.198	1413.52	32138.3	N/A	F	White
Control 7	117.185	1239.11	2528.27	32251	N/A	F	White
Control 8	38.115	481.156	8.76588	40311.2	N/A	M	White
Control 9	37.4282	230.569	113836	867758	N/A	F	White
Control 10	17.9477	757.036	2048.5	92799.9	N/A	F	White
Control 11	48.1564	1928.24	274107	518851	N/A	F	Asian
Control 12	172.387	1018.5	6609.31	46036.4	N/A	F	White
Control 13	53.0439	395.449	2021.5	14080.5	N/A	F	White
Control 14	155.402	2252.99	821.125	92941.1	N/A	F	White
Control 15	8.5446	154.763	68.7484	186.666	N/A	M	Asian
Control 16	361.332	6348.95	338.753	4020.77	N/A	M	White
Control 17	55.9187	464.242	503.485	9325.16	N/A	F	White
Control 18	82.1956	860.621	2692.99	80325.2	N/A	F	White
Control 19	1.25907	1037.69	1210.27	1548.97	N/A	M	White
Control 20	36.2509	316.944	15941.7	137024	N/A	F	White
Control 21	18.6767	261.843	733.287	3364.81	N/A	M	White
Control 22	60.5088	710.412	687.815	13063.7	N/A	F	White
Control 23	38.0916	160.981	83524.1	83524.1	N/A	F	White
Control 24	51.4785	141.587	558.664	3685.5	N/A	M	White
Control 25	89.6	702.472	462.78	2329	N/A	M	White
Control 26	111.847	101.136	1168.15	8313.58	N/A	F	White
Control 27	246.373	442.622	194.984	5384.05	N/A	F	White
Control 28	129.126	242.02	213.899	25942.9	N/A	F	White
Control 29	614.154	733.098	1477.79	50170.4	N/A	F	White
Control 30	101.411	158.11	586.46	211682	N/A	F	White
Control 31	118.944	342.787	39943.9	88375.2	N/A	F	White
Control 32	430.372	355.937	6492.04	7612.92	N/A	M	White
Control 33			9947.37	506690	N/A	F	White
Control 34	543.64	899.236	1712.6	15687.9	N/A	F	White
Control 35	395.286	263.125	18069.5	210365	N/A	F	White
Control 36			205.572	84.1846	N/A	M	White
Control 37	213.077	126.958	121.753	2448.8	N/A	F	White
Control 38	451.836	377.458	20023.6	42715	N/A	F	White
Control 39	362.119	346.411	844.759	20985.2	N/A	F	White
Control 40	425.194	591.041	62440.8	568103	N/A	F	White
Control 41	158.77	476.97	2470.17	10020.9	N/A	F	White
Control 42	116.834	434.366	800.057	184.502	N/A	M	White
Control 43	170.285	410.963	7272.42	10920.3	N/A	M	White
Control 44	98.3016	128.126	391469	514758	N/A	F	White
Control 45	559.549	1126.83	564.007	51124.8	N/A	F	White
Control 46	107.598	137.023	21577.6	51237.5	N/A	F	White
Control 47	105.524	353.313	4663.8	10758.4	N/A	F	White
Control 48	735.321	691.258	13340.8	47308	N/A	F	White
